# Supplementary material for: Photooxidative cleavage of zinc 20-substituted chlorophyll derivatives: conformationally P-helix-favored formation of regioselectively 19–20 opened linear tetrapyrroles
Source: Royal Society of Chemistry journal article supplement (doi:10.1039/c1pp05301a), 2011-12-03
Supplement: c1pp05301a.pdf [file c1pp05301a.pdf]

## Supplementary Information

# Photooxidative cleavage of zinc 20-substituted chlorophyll derivatives: conformationally *P*-helix–favored formation of regioselectively 19–20 opened linear tetrapyrroles

Hitoshi Tamiaki,<sup>\*a</sup> Yukihiro Okamoto,<sup>a</sup> Yuji Mikata<sup>b</sup> and Sunao Shoji<sup>a</sup>

<sup>a</sup>*Department of Bioscience and Biotechnology, Faculty of Science and Engineering, Ritsumeikan University, Kusatsu, Shiga 525-8577, Japan. E-mail : tamiaki@se.ritsumei.ac.jp; Fax. +81-77-561-2659; Tel. +81-77-561-2765*

<sup>b</sup>*KYOSEI Science Center, Nara Women's University, Nara, 630-8506, Japan*

**Table S1** Crystallographic Data for **6a**

| <b>6a</b>                                     |                                                                 |
|-----------------------------------------------|-----------------------------------------------------------------|
| Formula                                       | C <sub>35</sub> H <sub>38</sub> N <sub>4</sub> NiO <sub>5</sub> |
| FW                                            | 653.41                                                          |
| Crystal system                                | triclinic                                                       |
| Space group                                   | <i>P</i> 1                                                      |
| <i>a</i> , Å                                  | 10.232(6)                                                       |
| <i>b</i> , Å                                  | 12.112(7)                                                       |
| <i>c</i> , Å                                  | 12.793(8)                                                       |
| α, deg                                        | 76.70(2)                                                        |
| β, deg                                        | 79.05(2)                                                        |
| γ, deg                                        | 81.74(2)                                                        |
| <i>V</i> , Å <sup>3</sup>                     | 1506(2)                                                         |
| <i>Z</i>                                      | 2                                                               |
| <i>D</i> <sub>calc</sub> , g cm <sup>-3</sup> | 1.442                                                           |
| μ, cm <sup>-1</sup>                           | 6.954                                                           |
| 2θ <sub>max</sub> , deg                       | 55.0                                                            |
| temp, K                                       | 123                                                             |
| no. reflns collected                          | 11627                                                           |
| no. reflns used                               | 9082                                                            |
| <i>R</i> <sub>int</sub>                       | 0.0458                                                          |
| no. of params                                 | 811                                                             |
| final <i>R</i> 1 ( <i>I</i> > 2θ( <i>I</i> )) | 0.0579                                                          |
| <i>wR</i> 2 (all data)                        | 0.0660                                                          |
| GOF                                           | 0.991                                                           |

$$R1 = (\sum ||F_o| - |F_c||) / (\sum |F_o|).$$

$$wR2 = \{ [\sum w(F_o^2 - F_c^2)^2] / [\sum w(F_o^2)^2] \}^{1/2}.$$

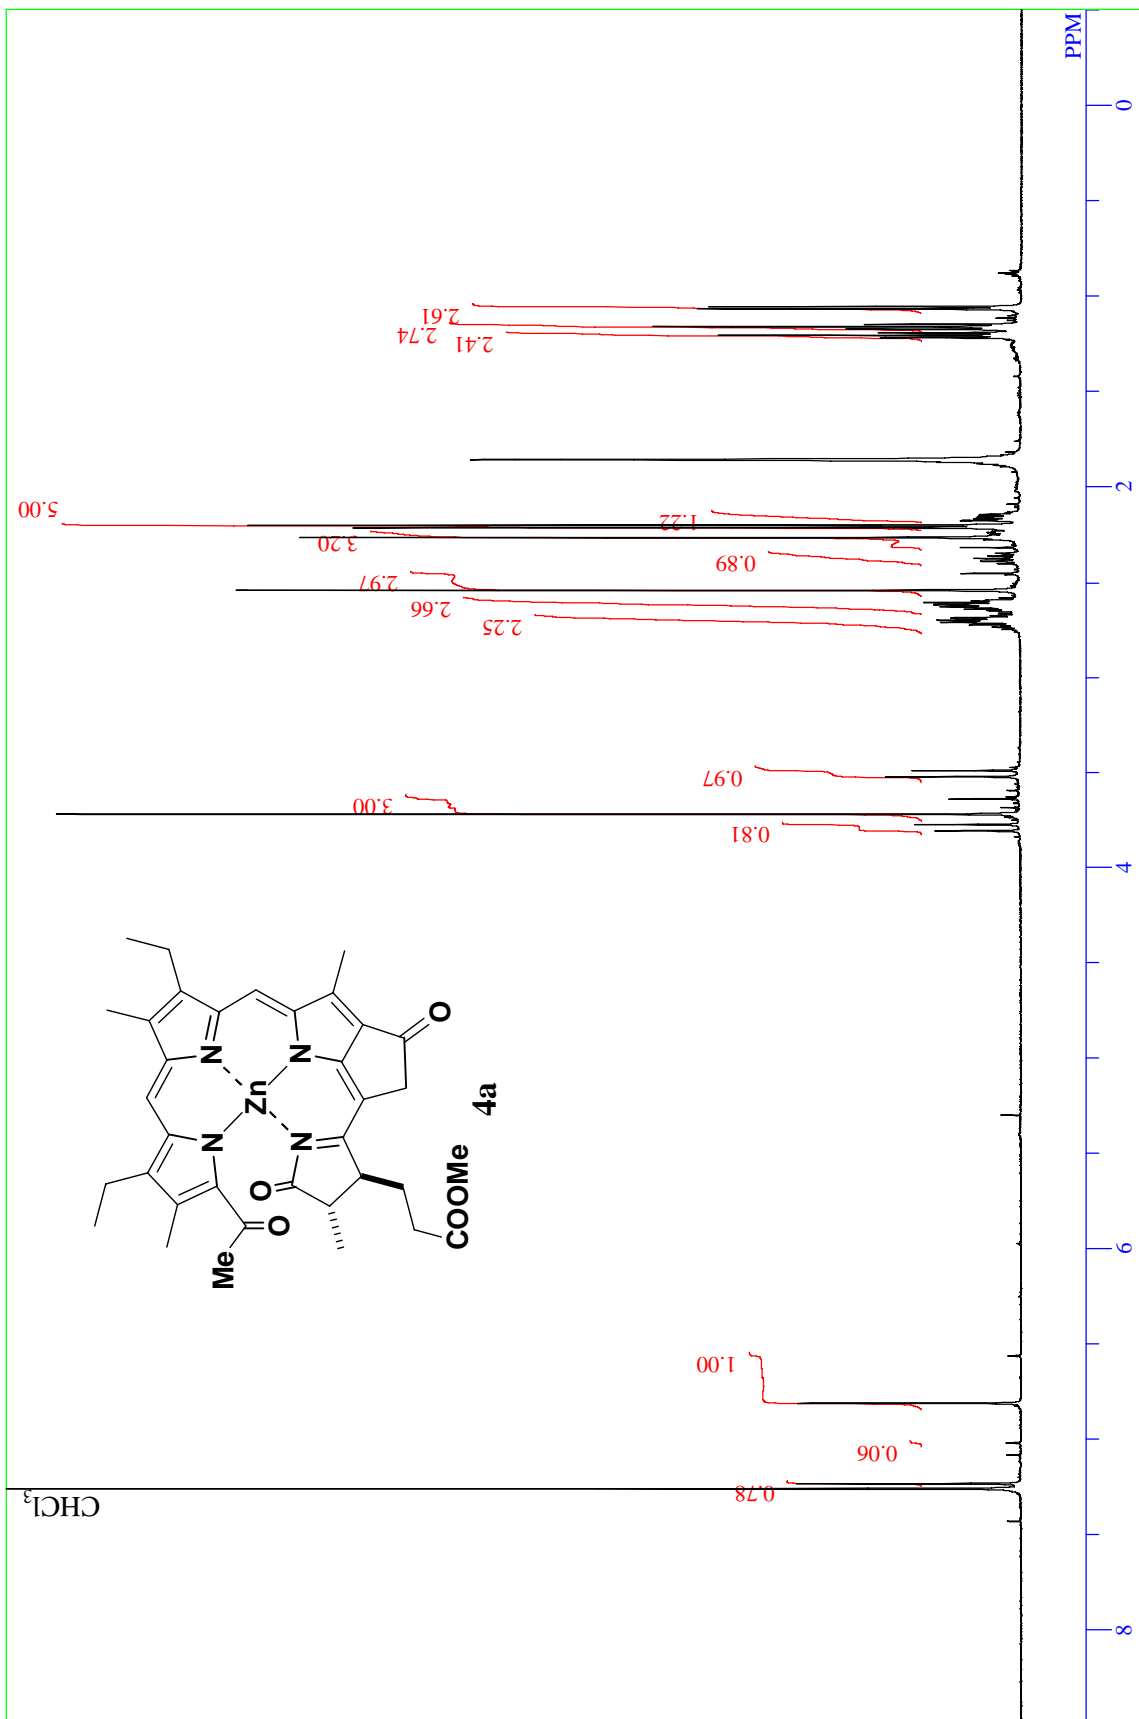

Fig. S1 <sup>1</sup>H-NMR spectrum of 4a in CDCl<sub>3</sub>.

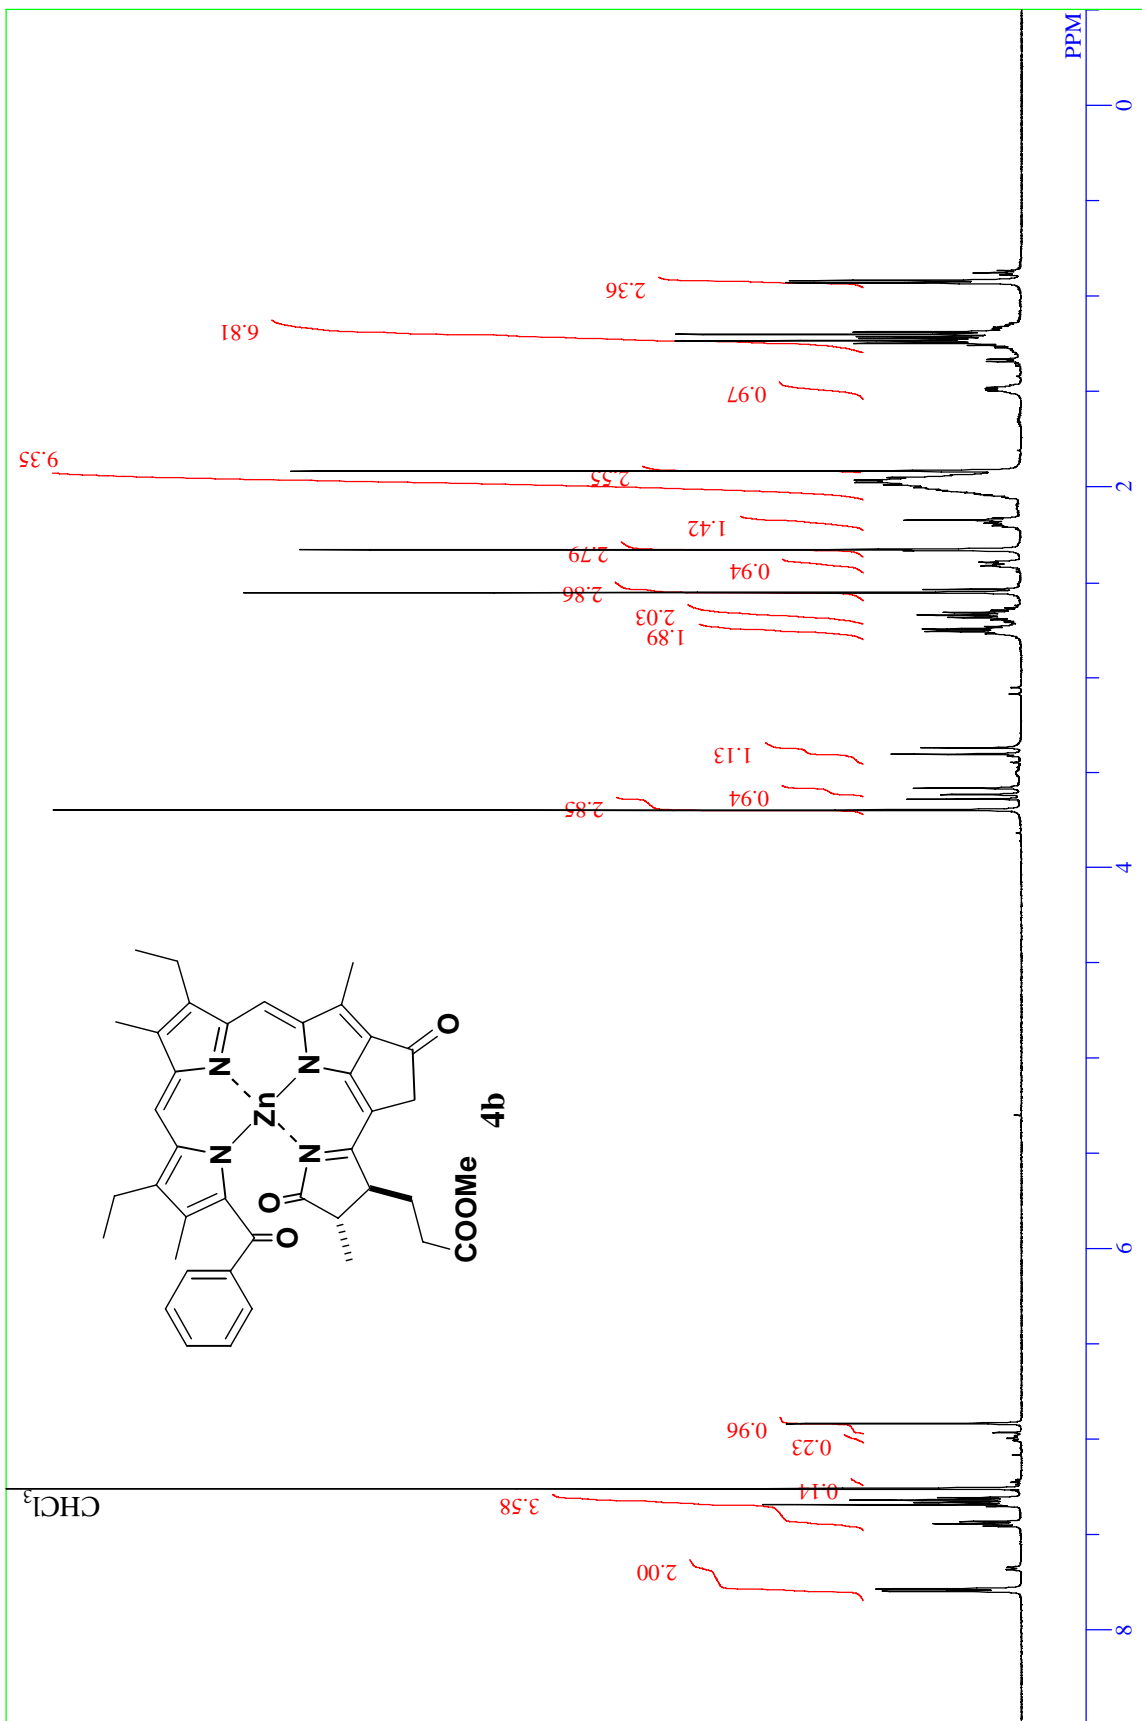

Fig. S2 <sup>1</sup>H-NMR spectrum of 4b in CDCl<sub>3</sub>.

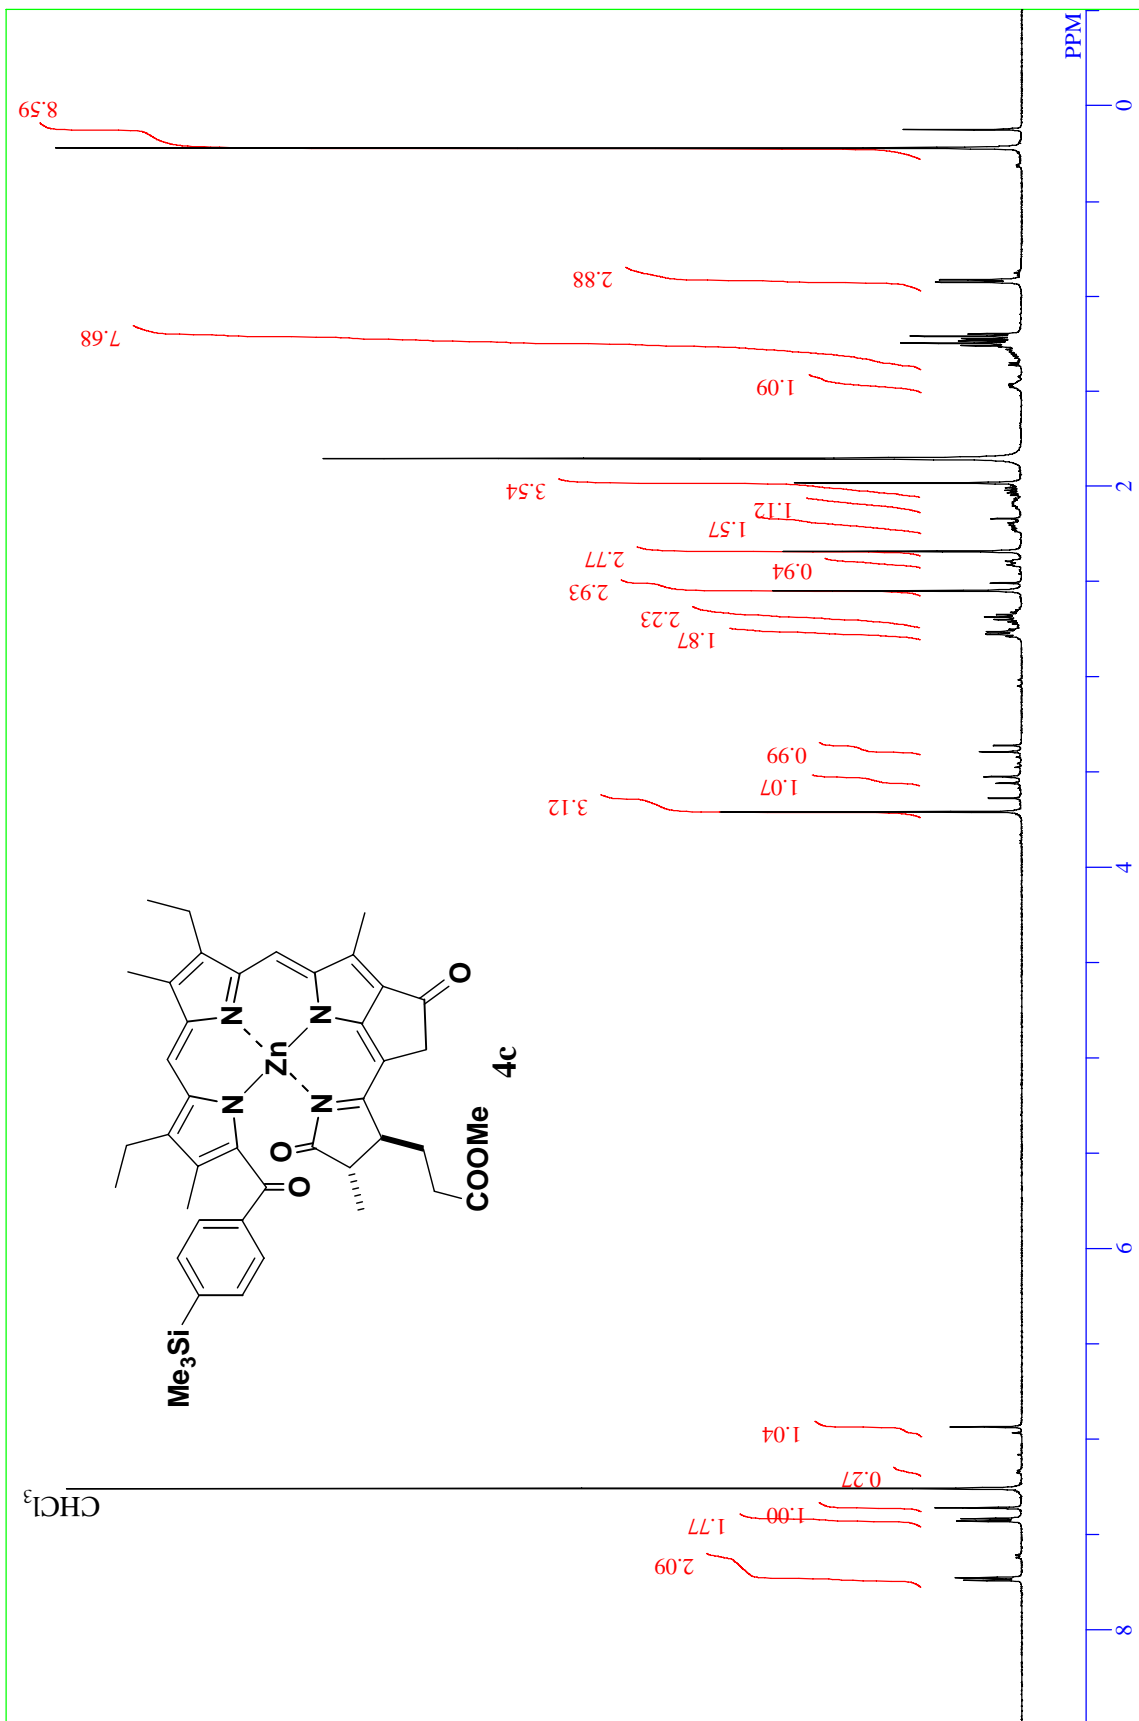

Fig. S3 <sup>1</sup>H-NMR spectrum of 4c in CDCl<sub>3</sub>.

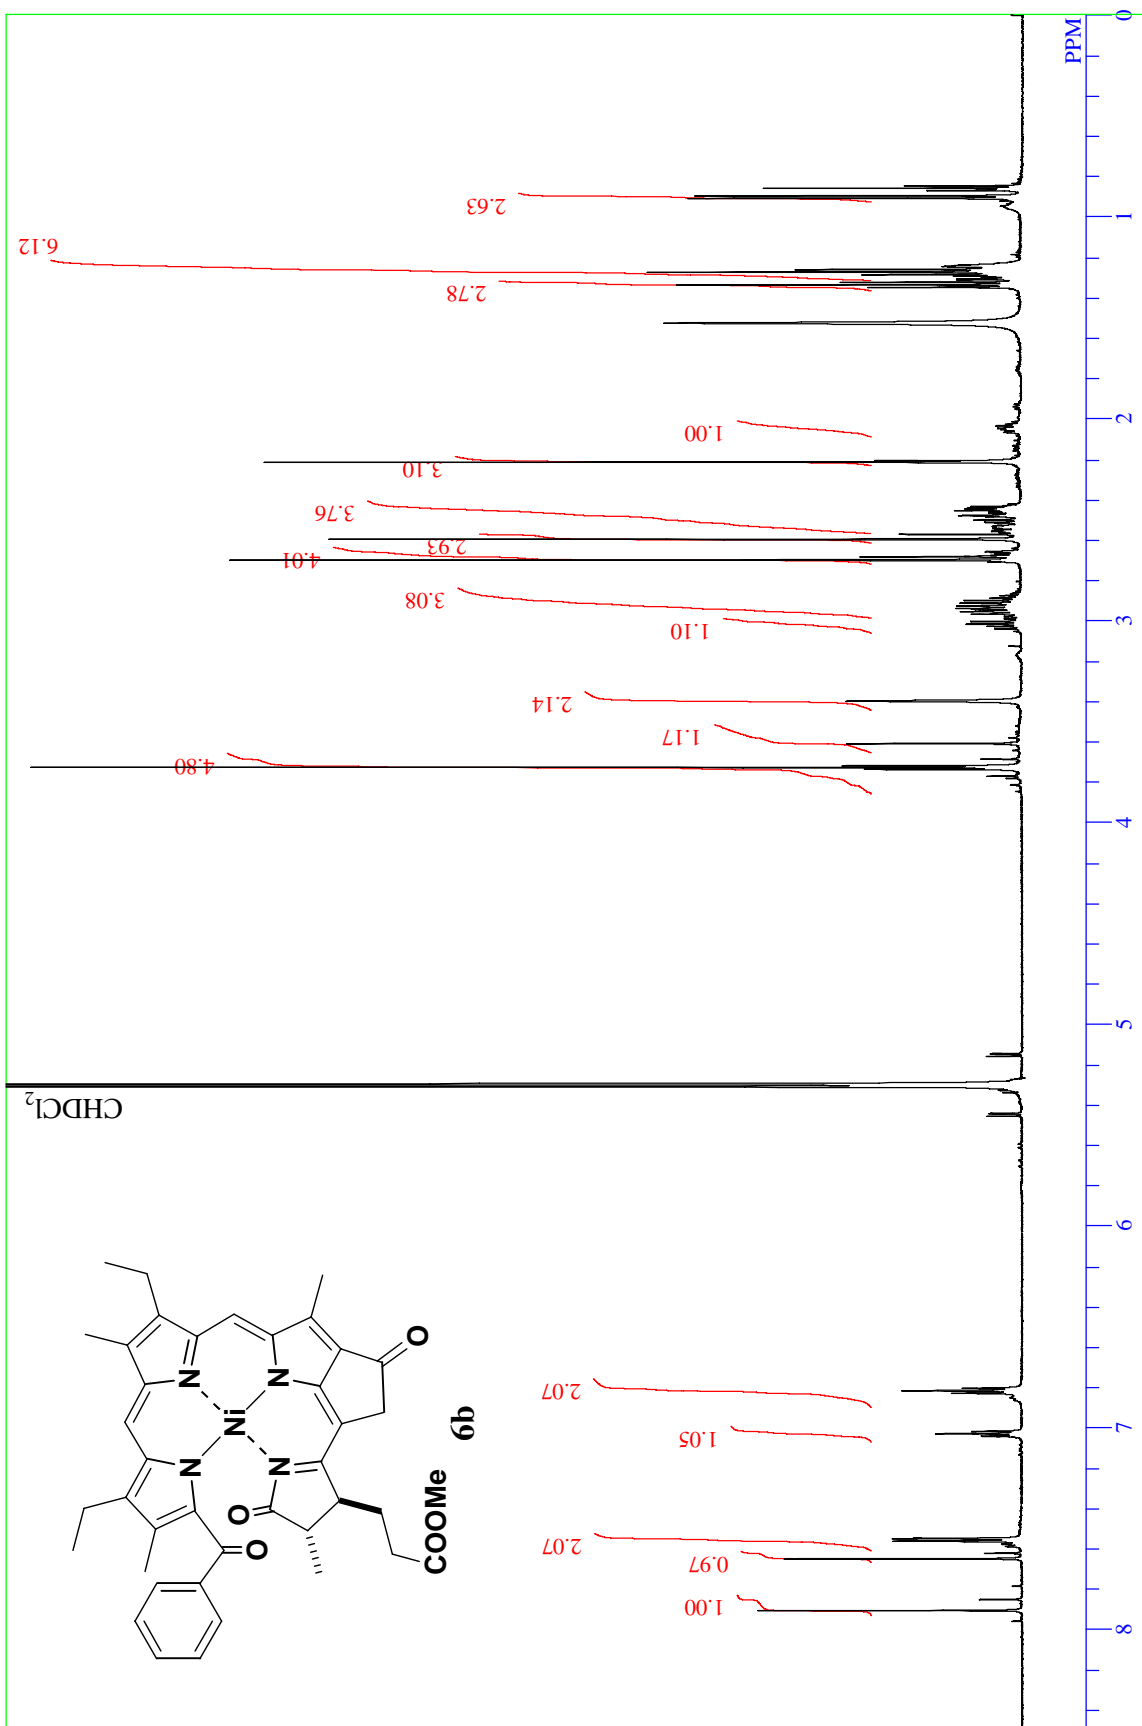

**Fig. S4** <sup>1</sup>H-NMR spectrum of **6b** in CD<sub>2</sub>Cl<sub>2</sub>.

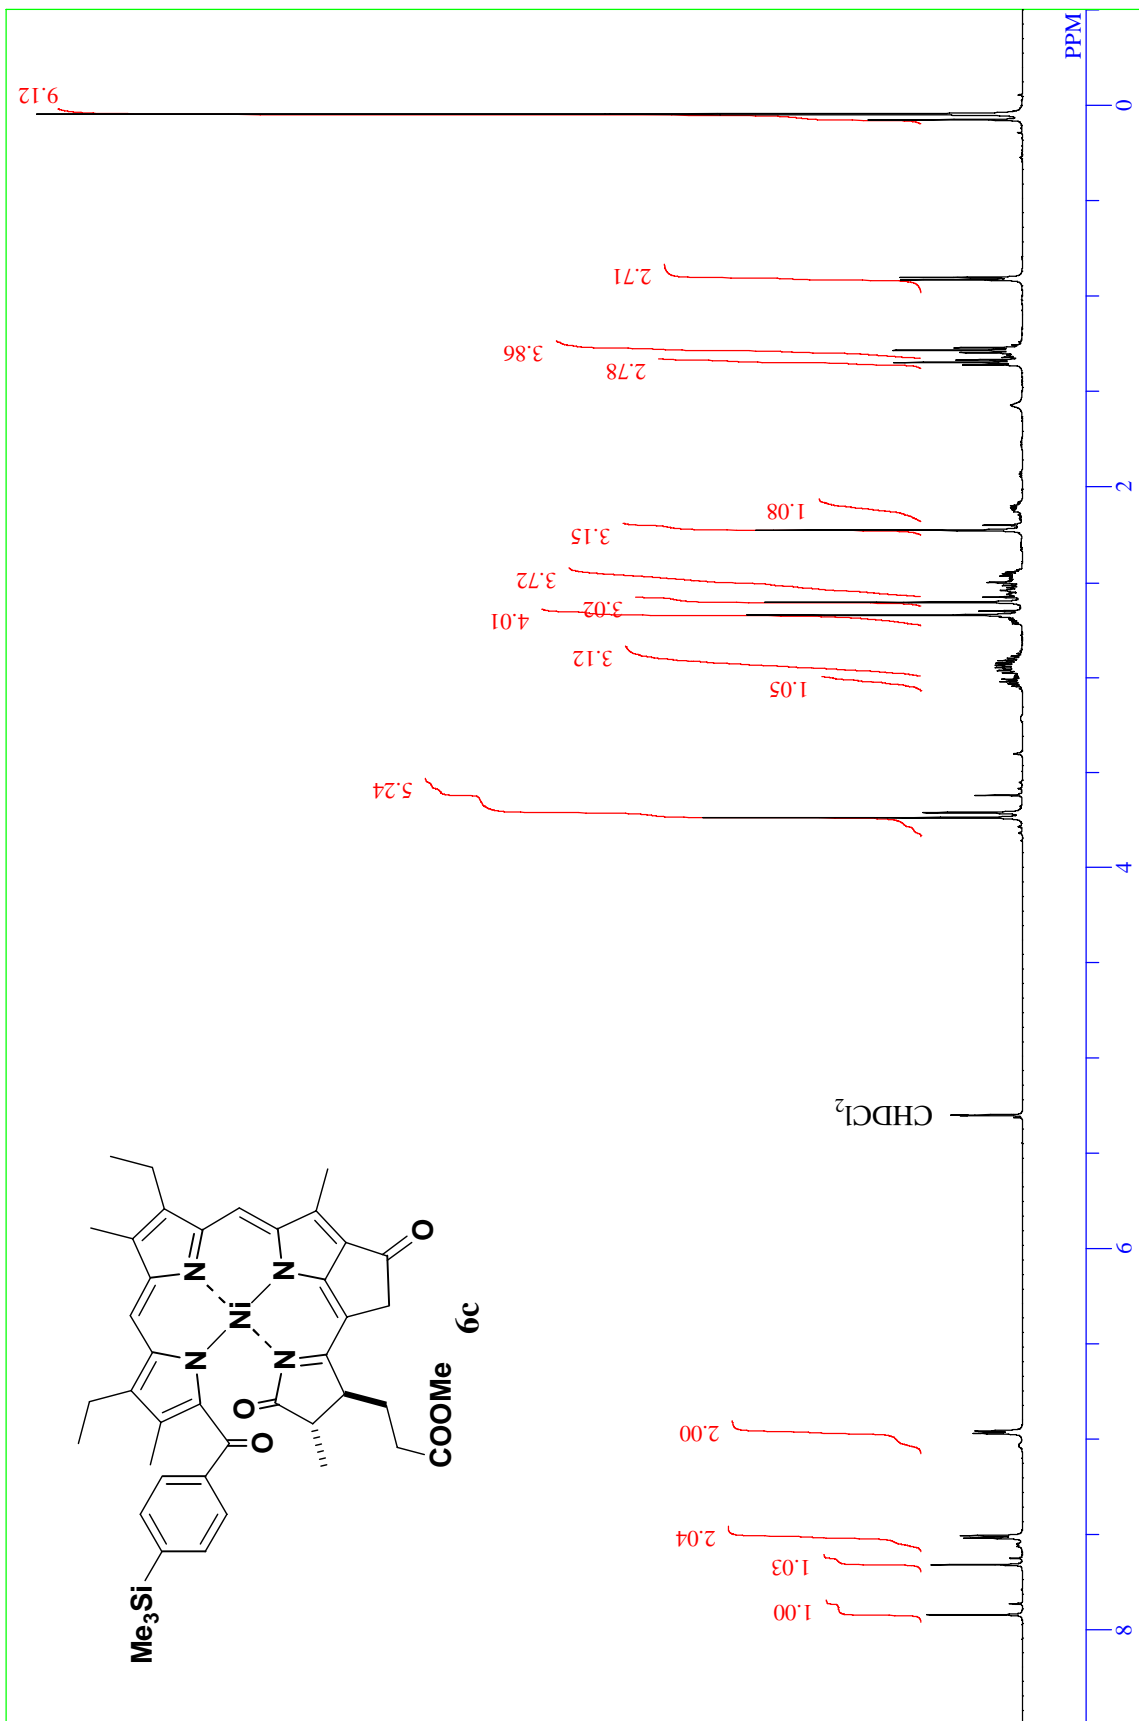

Fig. S5 <sup>1</sup>H-NMR spectrum of **6c** in CD<sub>2</sub>Cl<sub>2</sub>.

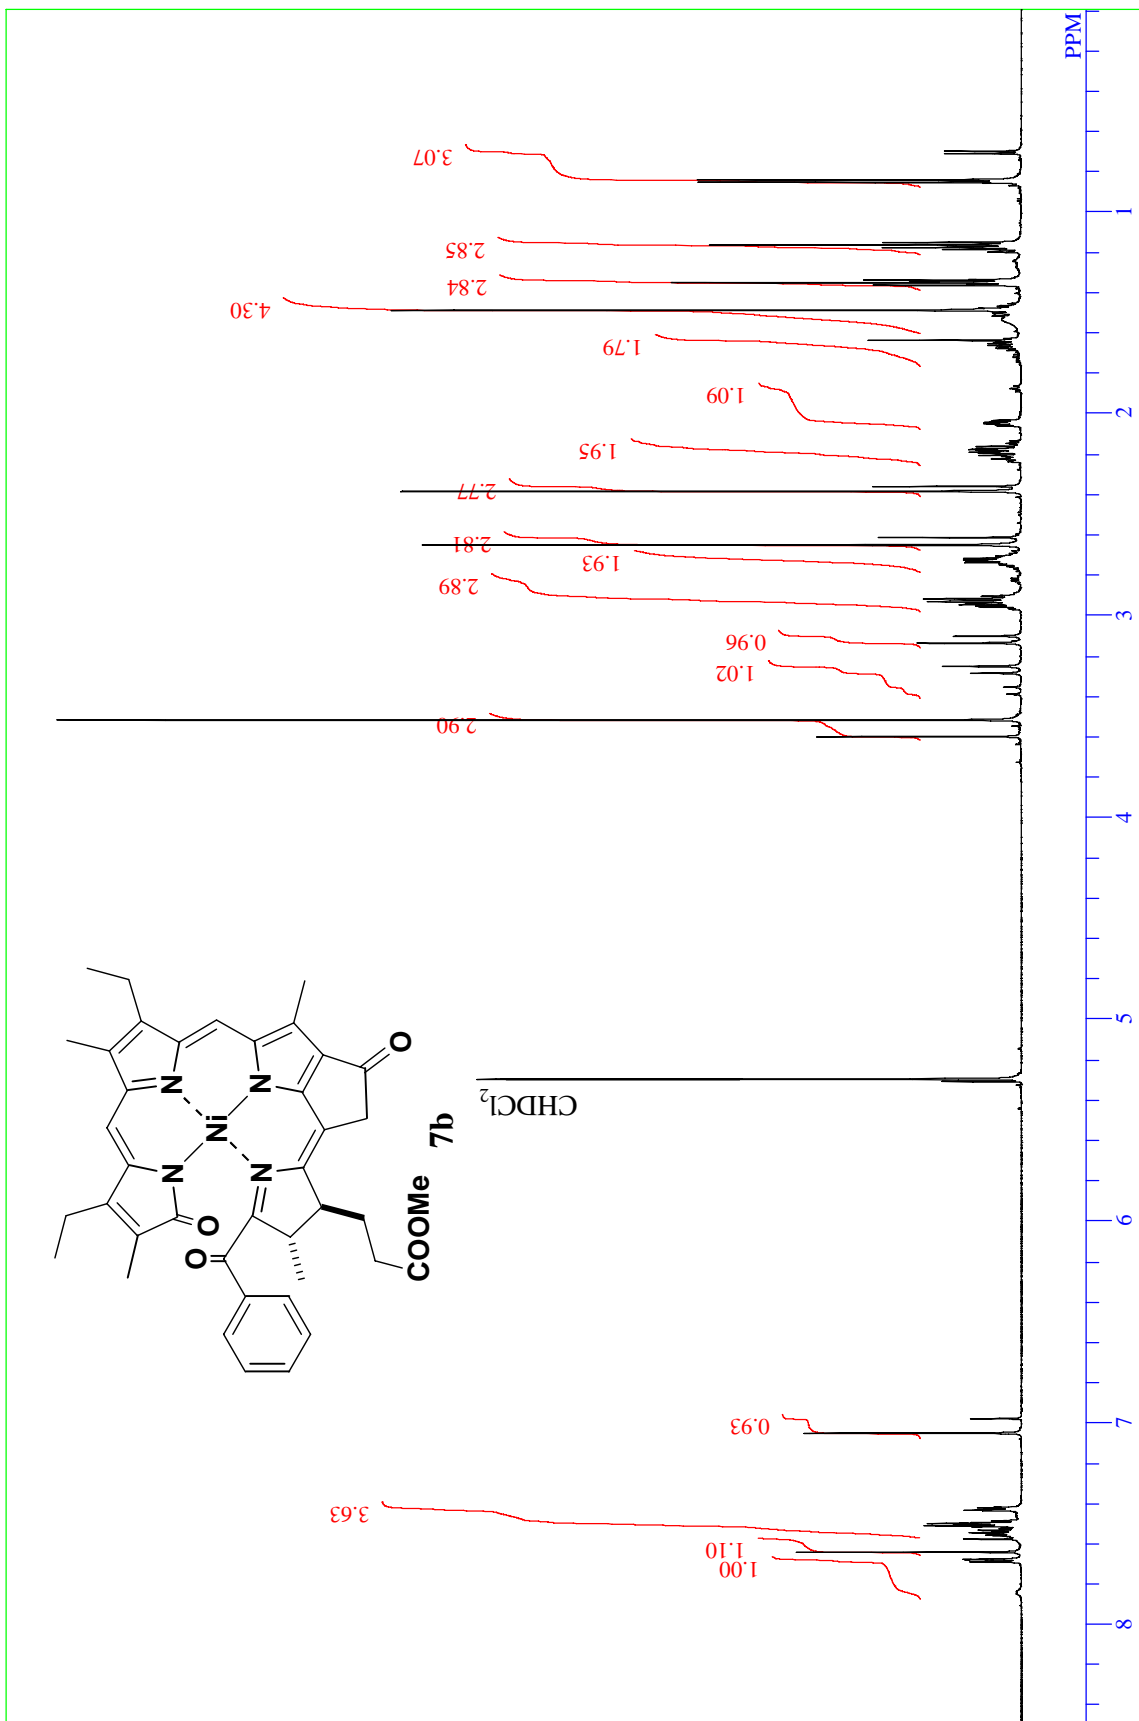

Fig. S6 <sup>1</sup>H-NMR spectrum of 7b in CD<sub>2</sub>Cl<sub>2</sub>.



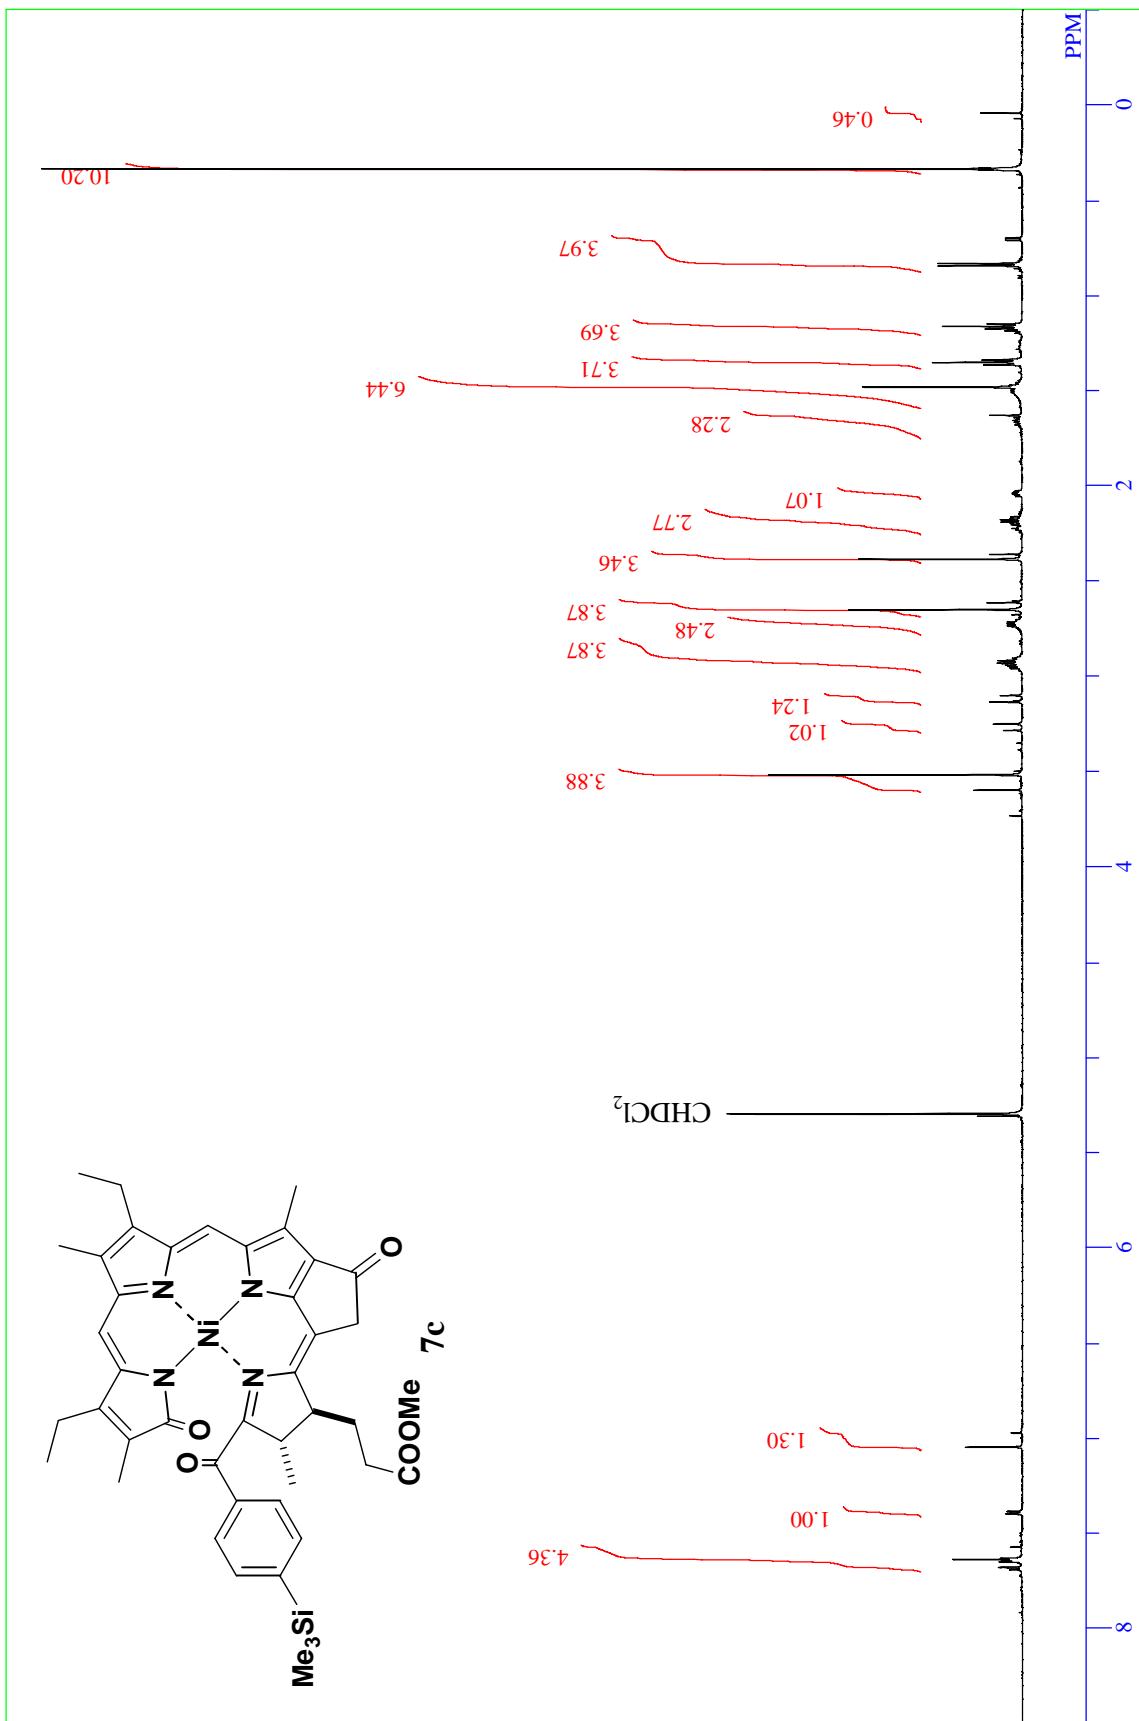

Fig. S7 <sup>1</sup>H-NMR spectrum of **7c** in CD<sub>2</sub>Cl<sub>2</sub>.

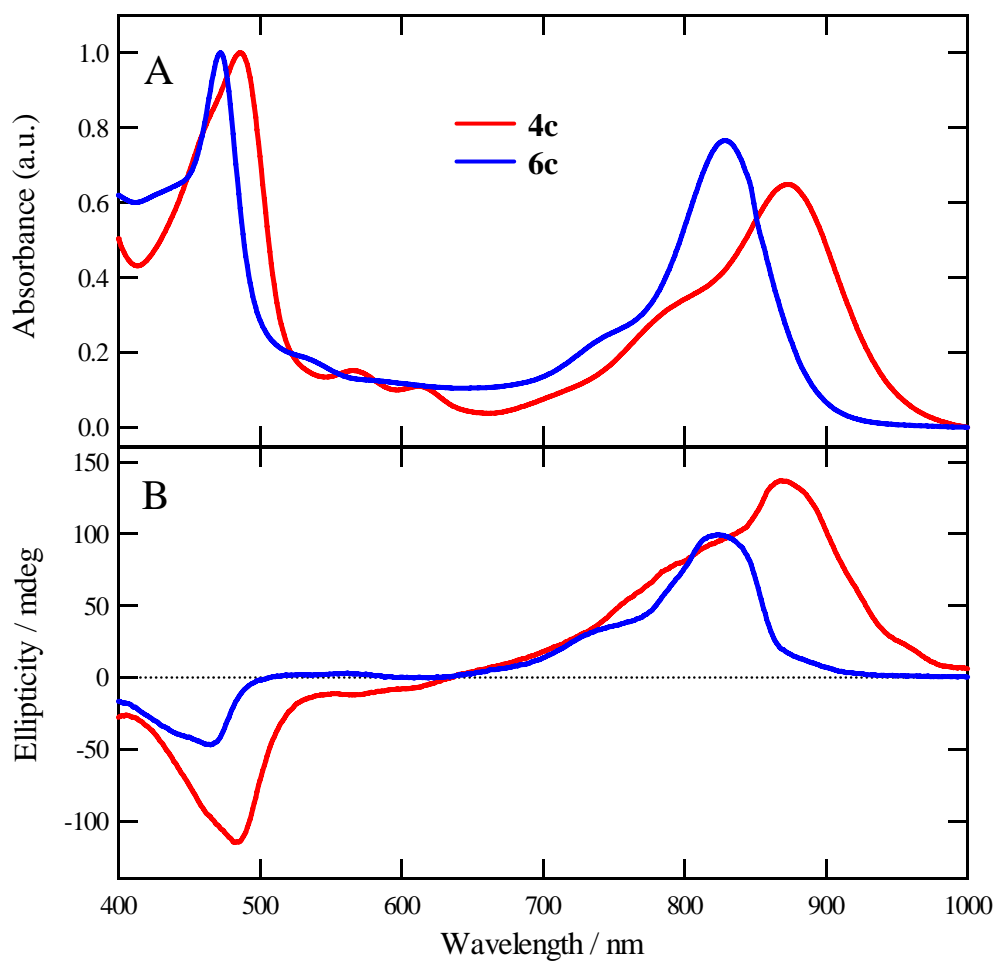

**Fig. S8** Electronic absorption (A) and CD spectra (B) of zinc and nickel complexes **4c** (red) and **6c** (blue) of 1-[4-(trimethylsilyl)phenyl-carbonyl]-19-oxo-bilatrine in dichloromethane. Both the spectra in A were normalized at the Soret maxima.

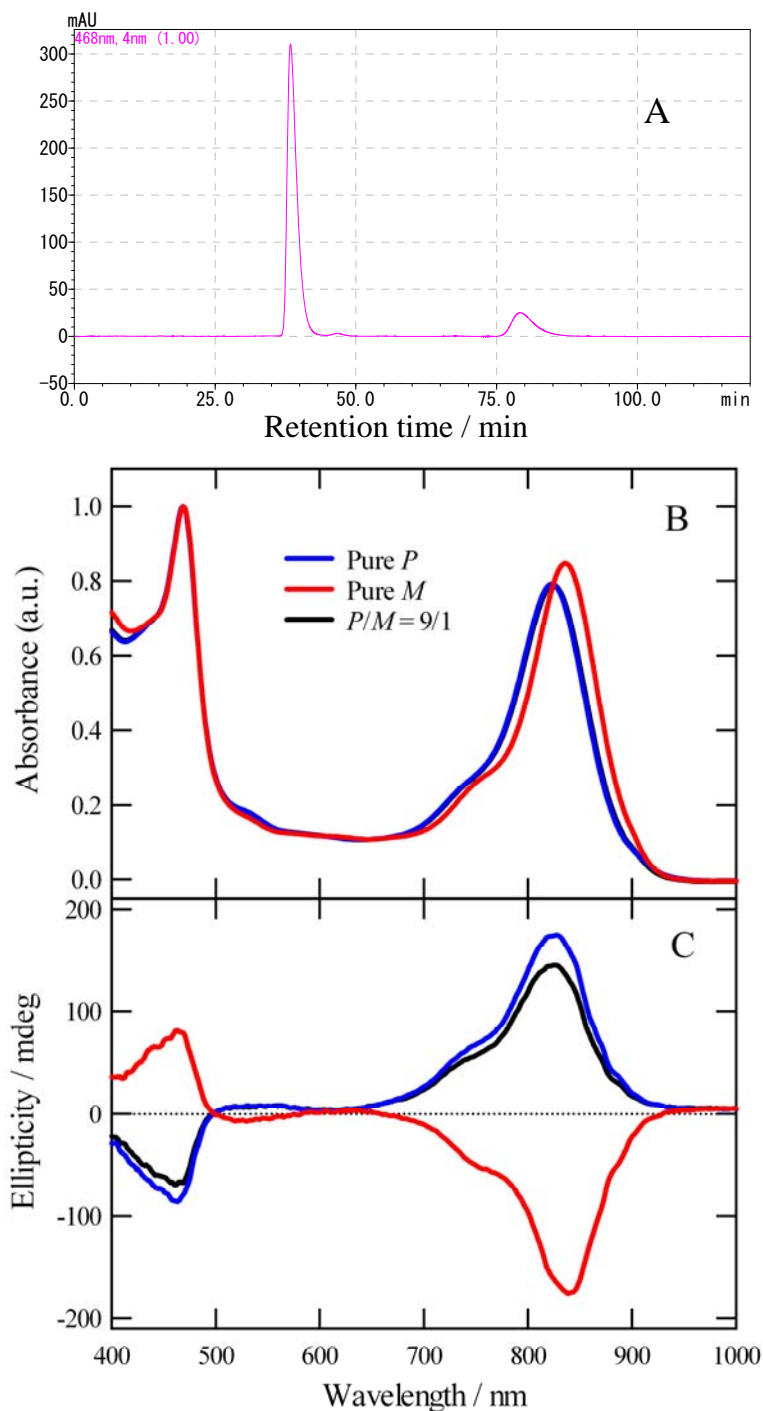

**Fig. S9** Chiral HPLC (A) of nickel 1-[4-(trimethylsilyl)phenyl-carbonyl]-19-oxo-bilatriene **6c**: column, Daicel Chiralpak IC 4.6 $\phi$  x 250 mm; eluent, methanol; flow rate, 0.8 ml min<sup>-1</sup>. Electronic absorption (B) and CD spectra (C) of **6c** in methanol: *P*- (blue) and *M*-helical conformers (red) as well as their 9:1 mixture (black). All the spectra in B were normalized at the Soret maxima.

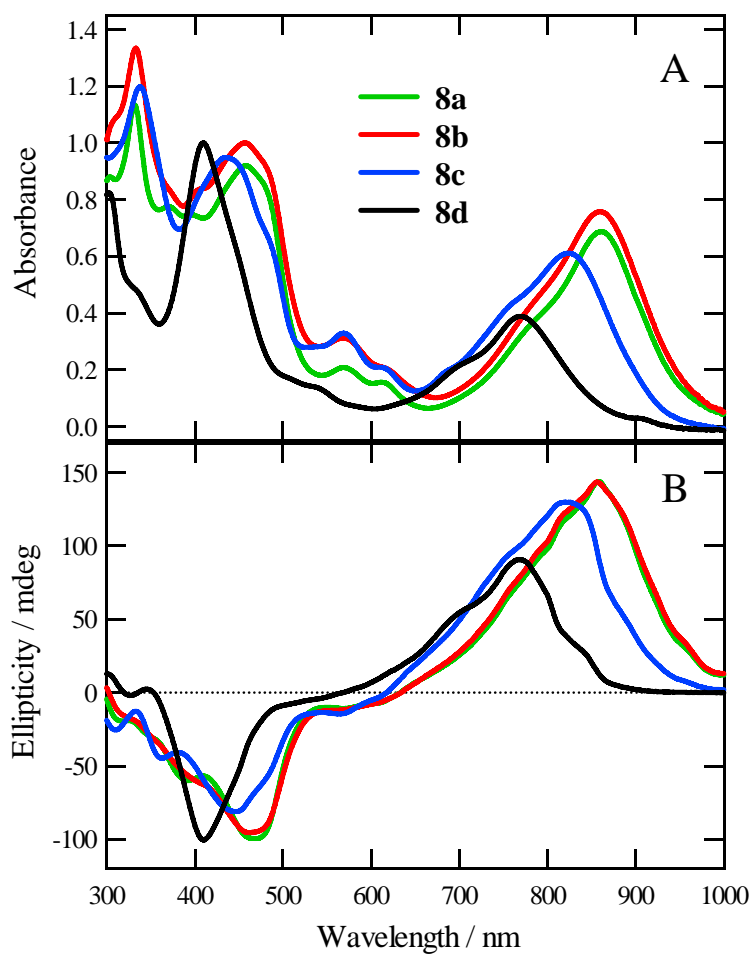

**Fig. S10** Electronic absorption (A) and CD spectra (B) of zinc complexes **8a–d** of 1-formyl-19-oxo-bilatriene in dichloromethane. All the molecular structures are shown in Fig. 7.
